# Supplementary material for: Therapeutic efficacy of apelin on transplanted mesenchymal stem cells in hindlimb ischemic mice via regulation of autophagy
Source: PubMed Central journal article supplement (PMC4763210; doi:10.1038/srep21914), 2016-02-23

## **Therapeutic efficacy of apelin on transplanted mesenchymal stem cells in hindlimb ischemic mice *via* regulation of autophagy**

Dong Liang<sup>1,3#</sup>, Dong Han<sup>1,2#</sup>, Weiwei Fan<sup>1,4</sup>, Ran Zhang<sup>1</sup>, Hongyu Qiao<sup>2</sup>, Miaomiao Fan<sup>2</sup>, Tao Su<sup>2</sup>, Sai Ma<sup>2</sup>, Xiujuan Li<sup>2</sup>, Jiangwei Chen<sup>2</sup>, Yabin Wang<sup>1</sup>, Jun Ren<sup>\*5</sup>, Feng Cao<sup>\*1,2</sup>.

<sup>1</sup> Department of Cardiology, Chinese PLA General Hospital, Beijing, 100853, China

<sup>2</sup> Department of Cardiology, Xijing Hospital, Fourth Military Medical University, Xi'an, Shaanxi 710032, China

<sup>3</sup> Department of Cardiology, Armed Police Corps Hospital of Shaanxi, Xi'an, Shaanxi 710032, China

<sup>4</sup> Department of Cardiology, **the 175<sup>th</sup> Hospital of Chinese PLA**, the Affiliated Southeast Hospital of Xiamen University, Zhangzhou, Fujian 363000, China

<sup>5</sup> Center for Cardiovascular Research and Alternative Medicine, University of Wyoming, Laramie, WY 82071, USA

# These authors contributed equally to this work and should be considered as co-first authors.

\*Correspondent author:

Jun Ren, MD, PhD

Center for Cardiovascular Research and Alternative Medicine, University of Wyoming, E-mail: [jren@uwyo.edu](mailto:jren@uwyo.edu);

Feng Cao, MD, PhD

Department of Cardiology, PLA General Hospital, Beijing, 100853, China, E-mail: [wind8828@gmail.com](mailto:wind8828@gmail.com), Tel:+86-10-55499138

**Email addresses:** DL: [liangdongld@gmail.com](mailto:liangdongld@gmail.com); DH: [handong123566@163.com](mailto:handong123566@163.com);

WWF:[820723047@qq.com](mailto:820723047@qq.com);RZ:[bjzhangran@126.com](mailto:bjzhangran@126.com);HYQ:

[qiaohongyu.1990@163.com](mailto:qiaohongyu.1990@163.com);MMF:[yuehaixiang1986@163.com](mailto:yuehaixiang1986@163.com);TS:

[utao2001@gmail.com](mailto:utao2001@gmail.com); SM: [masaimacey@gmail.com](mailto:masaimacey@gmail.com); XJL: [lixiujuan0716@126.com](mailto:lixiujuan0716@126.com);

JWC:[cjwfmumu@gmail.com](mailto:cjwfmumu@gmail.com);YBW: [scottss0415@gmail.com](mailto:scottss0415@gmail.com); JR: [jren@uwyo.edu](mailto:jren@uwyo.edu); FC: [wind8828@gmail.com](mailto:wind8828@gmail.com)

## Supplementary Figure Legends

**Supplementary Figure: Determination of eNOS phosphorylation in MSCs.** To achieve a better understanding of apelin-elicited cytoprotective effects, eNOS phosphorylation was assessed in MSCs. AD-MSCs were pretreated with or without apelin ( $10^{-6}$  M) for 24 hours. AD-MSCs were then subjected to a 4-hour hypoxia(H) followed with or without a 12-hour reoxygenation (H/R). eNOS phosphorylation was then determined using western blot. Presented values are means  $\pm$  SD. N=3 /group. Con, Control, \* $p < 0.05$  among groups.

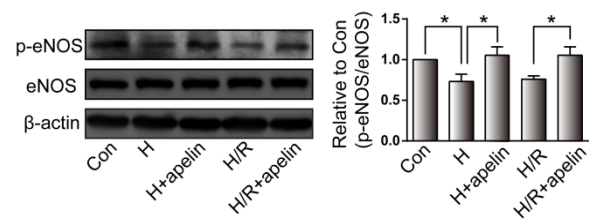

Supplement: srep21914-s1.pdf [file srep21914-s1.pdf]
